1  
2  
3  
4  
5  
6  
7  
8  
9  
10  
11  
12  
13  
14  
15  
16  
17  
18  
19  
20  
21  
22  
23  
24  
25  
26  
27  
28

# A single CRISPR base editor to induce simultaneous C-to-T and A-to-G mutations

Rina C. Sakata<sup>1,2,†</sup>, Soh Ishiguro<sup>1,3,4,†</sup>, Hideto Mori<sup>1,3,4,†</sup>, Mamoru Tanaka<sup>1</sup>, Motoaki Seki<sup>1</sup>, Nanami Masuyama<sup>1,3,4</sup>, Keiji Nishida<sup>6,7</sup>, Hiroshi Nishimasu<sup>8</sup>, Akihiko Kondo<sup>6,7,9</sup>, Osamu Nureki<sup>8</sup>, Masaru Tomita<sup>1,3-5</sup>, Hiroyuki Aburatani<sup>10</sup>, and Nozomu Yachie<sup>1-4,8,11,\*</sup>

<sup>1</sup>Synthetic Biology Division, Research Center for Advanced Science and Technology, the University of Tokyo, Tokyo 153-8904, Japan

<sup>2</sup>College of Arts and Sciences, the University of Tokyo, Tokyo 153-8902, Japan

<sup>3</sup>Institute for Advanced Biosciences, Keio University, Tsuruoka 997-0035, Japan

<sup>4</sup>Graduate School of Media and Governance, Keio University, Fujisawa 252-0882, Japan

<sup>5</sup>Faculty of Environment and Information Studies, Keio University, Fujisawa 252-0882, Japan

<sup>6</sup>Engineering Biology Research Center, Kobe University, Kobe 657-8501, Japan

<sup>7</sup>Graduate School of Science, Technology and Innovation, Kobe University, Kobe 657-8501, Japan

<sup>8</sup>Department of Biological Sciences, School of Science, the University of Tokyo, Tokyo 113-0033, Japan

<sup>9</sup>Department of Chemical Science and Engineering, Graduate School of Engineering, Kobe University, Kobe 657-8501, Japan

<sup>10</sup>Genome Science Division, Research Center for Advanced Science and Technology, the University of Tokyo, Tokyo 153-8904, Japan

<sup>11</sup>PRESTO, Japan Science and Technology Agency (JST), Tokyo 153-8904, Japan

<sup>†</sup>These authors contributed equally to this work.

\*Correspondence should be addressed to N.Y. ([yachie@synbiol.rcast.u-tokyo.ac.jp](mailto:yachie@synbiol.rcast.u-tokyo.ac.jp))

1 **While several Cas9-derived base editors have been developed to induce either C-to-T or A-to-G**  
2 **mutation at target genomic sites, the possible genome editing space when using the current base editors**  
3 **remains limited. Here, we present a novel base editor, Target-ACE, which integrates the abilities of both**  
4 **of the previously developed C-to-T and A-to-G base editors by fusing an activation-induced cytidine**  
5 **deaminase (AID) and an engineered tRNA adenosine deaminase (TadA) to a catalytically impaired**  
6 ***Streptococcus pyogenes* Cas9. In mammalian cells, Target-ACE enabled heterologous editing of multiple**  
7 **bases in a small sequence window of target sites with increased efficiency compared with a mixture of**  
8 **two relevant base editor enzymes, each of which may block the same target DNA molecule from the**  
9 **other. Furthermore, by modeling editing patterns using deep sequencing data, the editing spectra of**  
10 **Target-ACE and other base editors were simulated across the human genome, demonstrating the**  
11 **highest potency of Target-ACE to edit amino acid coding patterns. Taking these findings together,**  
12 **Target-ACE is a new tool that broadens the capabilities for base editing for various applications.**

13  
14 CRISPR–Cas9 is a genome editing tool in which Cas9 is recruited by a guide RNA (gRNA) to its target DNA  
15 region containing a protospacer adjacent motif (PAM) in its 3' end to induce a double-strand DNA break  
16 (DSB)<sup>1,2</sup>. This method has rapidly expanded our ability to knock out genes through error-prone DNA repair  
17 and to insert transgenes into chromosomes through DSB-induced homologous recombination (HR). Moreover,  
18 the DSB-induced HR also enables the substitution of targeted single bases by replacing a genomic sequence  
19 with a donor DNA template<sup>3</sup> for applications ranging from functional testing of genetic traits to developing  
20 clinical methods to correct disease mutations. However, this strategy for base substitutions through DSB has  
21 been shown to cause cell toxicity<sup>4</sup> and chromosomal deletions and translocations<sup>5</sup> and the low HR efficiency  
22 makes the introduction of multiple substitutions in different loci difficult.

23 In contrast, Cas9-derived base editors employ tethering of a deoxynucleoside deaminase to a nuclease-  
24 deficient or nickase Cas9 (dCas9 or nCas9)–gRNA complex to induce efficient and direct base substitutions in  
25 the genomic sequence<sup>6</sup>. Among the currently available base editors, cytosine base editors (CBEs)<sup>7,8</sup> and  
26 adenine base editors (ABEs)<sup>9</sup> enable highly efficient and precise base substitutions in a narrow window of  
27 gRNA targeting sites. CBEs commonly consist of two components fused to dCas9 or nCas9: a cytidine  
28 deaminase, such as rAPOBEC1 used in BEs<sup>8,10</sup> and PmCDA1 used in Target-AID<sup>7</sup>, to convert cytidines of the  
29 non-target strand into uridines by deamination; and a uracil glycosylase inhibitor (UGI) that inhibits base  
30 excision repair, allowing uracil bases to be replaced with thymine bases through the mismatch repair pathway  
31 and DNA replication (C-to-T base editing). ABEs instead utilize adenosine deaminases that convert adenosines  
32 to inosines<sup>9</sup>. While none of the naturally existing enzymes is known to catalyze the deamination of  
33 deoxyadenosines, directed protein evolution of an *Escherichia coli* tRNA adenosine deaminase (TadA) has  
34 been carried out and a heterodimer complex of wild-type and mutant TadA was found to exhibit the activity of  
35 converting targeted adenosines to inosines when fused to dCas9 or nCas9. As inosine bases are replaced with  
36 guanine bases through DNA replication, ABEs enable A-to-G base editing. The base editing efficiencies of  
37 CBEs and ABEs are elevated when nCas9 (D10A) is used to nick the target DNA strand complementary to the  
38 gRNA as the other strand with mutated bases is used as a repair template in the DNA nick repair process.

39 These base editors hold great promise in therapeutics as they can efficiently induce targeted base  
40 substitutions in chromosomes with low indel frequencies and minimal cell toxicity. While the currently  
41 available base editors enable four different transition mutations, C-to-T, G-to-A, A-to-G, and T-to-C, some of  
42 which have been demonstrated to correct or generate disease mutations in animal models<sup>11,12</sup>, there is no base  
43 editor that enables any of the other patterns. While no practical solution to develop base editors for the other  
44 eight non-deamination-mediated transversion mutations has yet been reported, a single base editor with both  
45 C-to-T and A-to-G base substitution activities would broaden the capability for genome editing, such as  
46 alteration of amino acid coding patterns. To this end, we have developed a new base editor, Target-ACE  
47 (adenine and cytosine editor), which induces simultaneous C-to-T and A-to-G base substitutions.

48  
49

## 1 **Dual functionality of Target-ACE**

2 We fused PmCDA1 of Target-AID and a heterodimer of TadA of ABE-7.10 with nCas9 (D10A) to develop  
3 Target-ACE (Fig. 1a). Previous studies reported that the C-terminus fusion of TadA and rAPOBEC1 abolished  
4 the base editing activity<sup>9</sup>, whereas efficient base editing was preserved in Target-AID fusing PmCDA1 to the  
5 C-terminus end<sup>8,13</sup>. Thus, we fused the TadA domain and PmCDA1 to the N- and C-termini of nCas9,  
6 respectively. Target-ACE was also designed to have a nuclear localization signal (NLS) and a C-terminal UGI,  
7 which increases the purity of C-to-T substitution.

8 To test the base editing activity of Target-ACE and other base editors in living cells without sequencing, we  
9 first constructed C-to-T and A-to-G base editing reporter circuits, in which the corresponding base  
10 substitutions were designed to activate EGFP protein translation. The C-to-T reporter circuit was designed to  
11 restore a mutated GTG start codon to ATG by C-to-T base editing of its antisense strand (Fig. 1b). In the A-to-  
12 G reporter, EGFP translation is released when a TAA stop codon encoded in its downstream region is broken  
13 to CAA by A-to-G base editing in its antisense strand (Fig. 1c). The C-to-T and A-to-G reporter circuits were  
14 introduced into human embryonic kidney HEK293Ta cells by lentiviral transduction. To each of the reporter  
15 cell lines, we then transfected base editor expression vectors with the reporter targeting gRNAs and observed  
16 their fluorescence activities. From the C-to-T reporter cells, EGFP expression was observed for Target-AID,  
17 Target-ACE, and the pooled transfection of Target-AID and ABE-7.10 expression vectors (BE mix), but not  
18 for ABE-7.10 (Fig. 1d and Supplementary Fig. 1). From the A-to-G reporter cells, EGFP expression was  
19 observed for ABE-7.10 and Target-ACE, but not for Target-AID, whereas slightly reduced EGFP induction  
20 was detected for BE mix (Fig. 1d and Supplementary Fig. 1).

21 Using amplicon sequencing, we then quantified the editing frequencies of the different base editing  
22 methods at the target regions for the reporter cell samples. The GTG-to-ATG conversion frequencies in the C-  
23 to-T reporter cell samples for Target-AID, ABE-7.10, BE mix, and Target-ACE were 38.43%, 0.23%, 28.56%,  
24 and 20.80%, respectively (Fig. 1e). The TAA-to-CAA conversion frequencies in the A-to-G reporter cell  
25 samples for Target-AID, ABE-7.10, BE mix, and Target-ACE were 0.04%, 10.60%, 1.03%, and 7.57%,  
26 respectively (Fig. 1f). Target-ACE showed base editing activities for both GTG-to-ATG and TAA-to-CAA  
27 conversions, which were, however, mildly diminished compared with the GTG-to-ATG conversion efficiency  
28 of Target-AID (fold change of 0.54) and the TAA-to-CAA conversion efficiency of ABE-7.10 (fold change of  
29 0.71). Notably, consistent with the fluorescence imaging experiment, the TAA-to-CAA conversion efficiency  
30 of ABE-7.10 was largely diminished when it was mixed with Target-AID. Given that the Cas9-gRNA  
31 complex remains bound to the target DNA molecule even after editing<sup>14</sup>, this suggests that Target-AID  
32 prevents the access of ABE-7.10 to the same target DNA molecule.

## 34 **Base editing spectrum of Target-ACE for targeting endogenous regions**

35 To test editing spectra of different base editing methods, we prepared 23 gRNAs targeting human  
36 chromosomal regions (Supplementary Table 1). Eight gRNAs were designed to target regions having poly-  
37 cytosine (poly-C) sequences in various positions relative to the PAM, while another set of eight gRNAs were  
38 similarly designed to target poly-adenine (poly-A) regions. The other seven gRNAs were designed to target  
39 alternating adenine and cytosine repeats; three had adenines and cytosines at even and odd positions,  
40 respectively, relative to the PAM (poly-AC), while four had the opposite arrangement (poly-CA). Each of the  
41 gRNA expression vectors was transfected into HEK293Ta cells with different base editor reagents and the base  
42 editing patterns were analyzed by amplicon sequencing of the target region (Supplementary Figs. 2–4).

43 The editing efficiencies of different base editing methods for the chromosomal regions were consistent with  
44 those observed in the C-to-T and A-to-G reporter cell assays. Among the poly-C, poly-AC, and poly-CA  
45 targets, the average frequencies of amplicon sequencing reads with C-to-T substitutions were on par for  
46 Target-AID and BE mix (33.84% and 34.72%, respectively), while that for Target-ACE was reduced (15.24%)  
47 (Supplementary Fig. 5). In contrast, among the poly-A, poly-AC, and poly-CA targets, the average frequencies  
48 of reads with A-to-G substitutions induced by ABE-7.10 (23.80%) were largely diminished upon mixing with

1 Target-AID (5.20%), while Target-ACE exhibited A-to-G base editing activity with an alleviated functional  
2 deficiency (12.26%) (Supplementary Fig. 6).

3 By taking the average of C-to-T and A-to-G base editing frequencies for every target sequence position  
4 relative to PAM, we also confirmed that the C-to-T and A-to-G editing spectra of Target-ACE were similar to  
5 those of Target-AID and ABE-7.10, respectively (Fig. 1g). Although we previously reported that the C-to-T  
6 base editing activity of Target-AID was in a restricted area of a target region with the peak activity position at  
7 -18 bp from PAM<sup>15</sup>, we found in this study that the editable region of Target-AID for C-to-T base editing with  
8  $\geq 1\%$  frequency spanned from -20 bp through -7 bp with two activity peaks at the positions of -18 bp as well  
9 as -10 bp (with peak heights of 31.00% and 14.45%, respectively). ABE-7.10 showed an A-to-G editable  
10 region spanning from -17 bp through -12 bp with an activity peak at -15 bp (23.37%), consistent with a  
11 previous report<sup>9</sup>. For Target-ACE, the editable region spanned from -20 bp to -10 bp for C-to-T editing, with  
12 activity peaks at -18 bp (14.90%) and -10 bp (2.41%) and from -17 bp to -13 bp for A-to-G editing with the  
13 activity peak at -15 bp (11.02%). Taken together, these results demonstrate that Target-ACE enables the C-to-  
14 T and A-to-G editing at target regions, whereas the simultaneous use of Target-AID and ABE-7.10 efficiently  
15 mediates the C-to-T, but not A-to-G, editing.

### 16 **Simultaneous editing of heterologous nucleotide bases**

17 Multiple cytosines of the poly-C regions and adenines of the poly-A regions were frequently co-edited by  
18 Target-AID and ABE-7.10, respectively (Supplementary Figs. 7 and 8). We also found that simultaneous C-to-  
19 T editing and A-to-G editing were induced in the seven poly-AC and poly-CA regions by Target-ACE and BE  
20 mix. Furthermore, the co-editing frequencies of Target-ACE were markedly higher than those of BE mix for  
21 31 out of 33 cytosine-adenine pairs, which showed co-editing frequencies of  $\geq 1\%$  by either of the two base  
22 editing methods (Fig. 2a). Furthermore, consistent with the editing spectra of Target-ACE for C-to-T and A-to-  
23 G base substitutions, the co-editing frequency of heterologous bases was generally higher, for which cytosines  
24 and adenines were closer to the positions -18 bp and -15 bp relative to PAM, respectively. Indeed, the highest  
25 co-editing frequency was observed for the -18C:-15A pair among the entire heterologous cytosine-adenine  
26 pairs in all of the three poly-CA regions involving the -18C:-15A pair. The co-editing frequencies of  
27 heterologous bases by Target-ACE ranged from 0.89- to 5.87-fold compared with those by BE mix, with  
28 average fold difference of 2.53; the larger differences were observed for the cytosine-adenine pairs for which  
29 A-to-G substitution frequencies were markedly lower for BE mix (Fig. 2b and Supplementary Fig. 6).

30 To explore the simultaneous editing spectra of the different base editing methods, we calculated their co-  
31 editing scores for all pairs of two cytosine and/or adenine nucleotides in the poly-AC and poly-CA regions,  
32 where the co-editing score refers to the intersection-over-union for substituted bases in two different positions  
33 (Supplementary Figs. 9-12). While Target-AID and ABE-7.10 showed only co-editing activities against the  
34 same transition mutations and the average co-editing profiles of BE mix with the minimal A-to-G editing  
35 activity were similar to those of Target-AID, Target-ACE showed high co-editing activity for both adenines  
36 and cytosines in a restricted area relative to the PAM position (Fig. 2c and Supplementary Fig. 13). We also  
37 examined the efficiencies of more complex base editing patterns comprising both C-to-T and A-to-G  
38 substitutions for more than two positions by Target-ACE and BE mix. In five of the seven poly-AC and poly-  
39 CA target regions, Target-ACE outperformed BE mix in more than half of the top eight outcomes that BE mix  
40 preferentially produced (Fig. 2d and Supplementary Fig. 14). This result also demonstrated that the  
41 simultaneous C-to-T and A-to-G base editing activity of Target-ACE is higher than that of BE mix.

### 42 **Computational modeling of base editing outcomes**

43 While recent studies reported that wild-type Cas9-mediated genome-editing outcomes can be predicted by  
44 machine learning approaches from sequences of target regions<sup>16-18</sup>, there have been no approaches to  
45 computationally predict base-editing outcomes. We thus sought to establish a base-editing prediction  
46 framework by simple modeling of conditional base transition probabilities (Fig. 3a). Using this model, we  
47 predicted the frequencies of all of the observed editing outcomes in each of the 23 target regions by training  
48  
49

1 the other target regions, and found that the predicted frequencies were significantly correlated with the actual  
2 measurements for all of the base editing methods ( $P$ -value  $< 10^{-24}$ ) (Fig. 3b and Supplementary Fig. 15).

3 To abstract the multi-dimensional editing spectrum of each base editing method, we next predicted the  
4 frequencies of single and combinatorial base conversion patterns induced in simulated poly-C, poly-A, poly-  
5 AC, and poly-CA sequences spanning from -24 bp through -5 bp relative to PAM. The single base editing  
6 spectra (Fig. 3c) and co-editing score profiles (Supplementary Fig. 15) predicted for different base editing  
7 methods were similar to those obtained from the experimental assays, also supporting the validity of the  
8 prediction framework. Furthermore, while the sequencing read depth limited the evaluation of tri- or more-  
9 base conversion frequencies from the actual amplicon sequencing datasets, the trained models allowed us to  
10 predict tri-nucleotide co-editing score profiles for different base editing methods (Fig. 3d). In this prediction,  
11 we found that the heterologous tri-nucleotide editing scores were almost always reduced for BE mix, whereas  
12 Target-ACE exhibited similar scores for both heterologous and homologous tri-nucleotide editing patterns.

### 14 Codon conversion potentials of different base editing methods

15 Finally, we examined whether the simultaneous C-to-T and A-to-G base editing activity of Target-ACE  
16 expands the potential editing space of protein-coding patterns in the human genome. For each of 11,250,496  
17 source codons in the human genome (corresponding to 20,062 RefSeq genes), we first predicted the  
18 frequencies of codon conversions to different destination codons by all of the possible gRNAs under the  
19 different base editing models, where each codon conversion was scored to be successful when the surrounding  
20  $\pm 15$  bp region was intact. The potential of conversion of each codon to a given destination codon was then  
21 defined to be its maximum predicted conversion frequency among those by the possible gRNAs for the same  
22 genomic position. Finally, we generated a codon convertibility profile (CCP) for each of the different base  
23 editing methods, where each source-destination codon pair was scored by the fraction of the source codons in  
24 the genome with conversion potential exceeding or equal to a given threshold (Fig. 4a and Supplementary  
25 Figure 16). As previously reported<sup>19</sup>, the potential codon conversion spaces of Target-AID and ABE-7.10 were  
26 both limited across all of the source-destination codon pairs, and their CCPs showed almost mirror images  
27 largely because of the symmetricity between the C•G-to-T•A and A•T-to-G•C base transitions. The CCP of BE  
28 mix was also similar to that of Target-AID as expected from the similarities in base editing patterns observed  
29 in the other analyses in this study. When the conversion profile threshold of 3% was applied, Target-ACE  
30 showed 24 more codon conversion patterns corresponding to 18 amino acid conversions compared with the  
31 union of the other base editing methods. In contrast, the numbers of targetable codons with conversion  
32 potential of  $\geq 3\%$  for different destination codons were reduced to 0.40-fold on average from Target-AID to  
33 Target-ACE for those targetable by Target-AID. A similar reduction in number of targetable codons was also  
34 observed for the equivalent comparison with ABE-7.10 (0.31-fold). The same values of fold change for BE  
35 mix were 1.00 and 0.05 compared with Target-AID and ABE-7.10, respectively. Nevertheless, out of the 60  
36 codon conversion patterns that require both C•G-to-T•A and A•T-to-G•C base transitions, 50 patterns (48 non-  
37 synonymous substitutions; 30 amino acid substitutions) showed significantly higher codon conversion  
38 potentials for Target-ACE than for BE mix (Fig. 4b).

### 40 Discussion

41 While a recent study has reported a RNA base editor that utilizes dCas13 fused to an engineered ADAR2  
42 retaining both the wild-type A-to-I and engineered C-to-U editing activities<sup>20</sup>, Target-ACE is the first that has  
43 demonstrated simultaneous C-to-T and A-to-G base substitutions in a narrow window of a target DNA region  
44 in a highly efficient manner. The simultaneous editing of heterologous bases by BE mix was inefficient, since  
45 the ABE-7.10-mediated A-to-G editing was largely abolished at most of the target sites. This suggests that  
46 Target-AID preferentially binds to a target DNA molecule through a gRNA and prevents the access of ABE-  
47 7.10, whereas the C-to-T and A-to-G editing activities of Target-ACE are free from this competition for access  
48 to targets. As shown in our simulation analyses, Target-ACE expands the potential space for editing amino  
49 acid coding patterns in the genome compared with the other CBEs and ABEs, highlighting its potential for

1 therapeutic applications including the correction of disease-related mutations. Target-ACE could also be  
2 applied for *in vivo* mutagenesis. CRISPR-X involving a mutant human AID has been developed as a sequence  
3 diversification tool to induce C-to-A/G/T base substitutions for around a hundred base pair region of a target  
4 site, albeit with low efficiency at each position<sup>21</sup>. TAM incorporating another mutant human AID enables C-  
5 to-A/G/T base substitutions with high efficiency, but for a narrow editing window<sup>22</sup>. Although Target-ACE is  
6 also limited in the width of its editable region, this could somehow be supplemented by the use of multiple  
7 gRNAs, as previously demonstrated using TAM<sup>22</sup>. The strategy of multi-domain fusion employed in Target-  
8 ACE would at least drive the development of other base sequence diversification tools with broader base  
9 transition ability.

10 The estimated potential of precise codon conversion by Target-ACE was similar for all source–destination  
11 codon pairs that require C•G-to-T•A and/or A•T-to-G•C editing, whereas Target-AID and ABE-7.10 were  
12 suggested to surpass Target-ACE in conversion potential for the codon pairs that require only C•G-to-T•A and  
13 A•T-to-G•C editing, respectively. The C-to-T and A-to-G editing activities of Target-ACE were reduced by  
14 roughly up to half compared with those of Target-AID and ABE-7.10, respectively. Since the base editing  
15 spectra of Target-AID and ABE-7.10 were largely inherited in Target-ACE, most of the engineering strategies  
16 that have been adopted to optimize the effector domains of CBEs<sup>23-26</sup> and ABEs<sup>23</sup> could be additively adapted  
17 to improve the efficacy of Target-ACE without destroying its basic characteristics. While the overall low  
18 efficiency of Target-ACE is likely to be some structural unconformity of the large protein fusion of a total of  
19 2,160 aa to express all of the three different functions originated from Cas9, PmCDA1 and TadA heterodimer,  
20 a protein engineering approach could also be applied to alleviate this effect or to produce a more optimized  
21 tool.

22 The aggregative bystander activities of two base editing effectors also confer the lower efficiency in  
23 precision source–destination codon conversions by producing more unexpected editing outcomes compared  
24 with those by independent CBEs or ABEs. This would be problematic, especially when unexpected base  
25 substitutions need to be minimized in the context of precision base editing. The bystander activity of Target-  
26 ACE could be reduced, using the engineered rAPOBEC1, APOBEC3A, PmCDA1, and TadA effector domains,  
27 which have narrow effective window sizes<sup>13,27-30</sup>. The use of a computational prediction method can also be  
28 considered to avoid genomic target regions that have high potential of being altered into unexpected sequences.  
29 While this study constructed simple conditional probability models for different base editing methods and  
30 achieved a certain level of performance in predicting base editing outcomes, other machine learning  
31 approaches could improve the prediction, particularly when coupled with base editing results for more target  
32 sites obtained by *en masse* DNA barcode-based mutational profile assays<sup>16-18,31</sup> or by robotic automation.

33 Nevertheless, we here highlight that the multi-domain fusion strategy taken in Target-ACE is currently the  
34 best approach for inducing both C-to-T and A-to-G mutations in the DNA of the same cells. In general, the  
35 efficiency of gene delivery to cells is limited and decreased with increasing vector size. For gene therapy,  
36 retroviral and lentiviral transduction efficiencies are widely accepted to be maintained at a modest level for  
37 gene inserts of up to ~10 kbp. Thus, as the insert sizes of Target-AID and ABE-7.10 are >6 kbp each including  
38 a promoter region, it would be difficult to transduce cells with a viral vector harboring both Target-AID and  
39 ABE-7.10. Even if this were successful, the heterologous base editing of infected cells would then suffer from  
40 the issue of activity competition of BE mix. Separate viral packaging followed by simultaneous or serial  
41 transduction of cells for the two different base editors would not be ideal for simultaneous C-to-T and A-to-G  
42 editing, especially when the infection efficiency is low, for example, in somatic tissues. The probability of  
43 multiple genes on different viral genomes being delivered to the same cell can be expected to exponentially  
44 decrease with the number of genes; this co-infection approach would therefore mostly produce undesired base  
45 editing outcomes by either of the base editors. Comparing these possible approaches with the existing CBEs  
46 and ABEs, Target-ACE of a total size of 7.1 kbp including a promoter region appears to be more beneficial for  
47 inducing heterologous mutations in the same cells.

48 Several studies have reported genome-wide off-target effects of CBEs<sup>32,33</sup> and transcriptome-wide off-  
49 target RNA editing by some CBEs and ABEs, which have base editing effectors originating from RNA editing

1 enzymes<sup>30,34-36</sup>. While the off-target RNA editing activity of Target-AID using the deoxycytidine deaminase  
2 PmCDA1 remains to be examined, Target-ACE is also expected to have at least a certain level of DNA off-  
3 target activity and carry over the RNA off-target effect from ABE-7.10. However, these undesired effects of  
4 CBEs and ABEs have been successfully attenuated by engineered mutations<sup>30,34-38</sup>. We expect that Target-  
5 ACE can incorporate these engineered mutations as well as other mutations mentioned above. Furthermore,  
6 other design considerations contributing to the optimization of wild-type Cas9<sup>15,39-43</sup> should also be adaptable  
7 to Target-ACE, as seen in our previous example of Target-AID-NG, which is based on the engineered SpCas9-  
8 NG architecture that recognizes a single guanine PAM<sup>15</sup>.

9 Taking the obtained findings together, we have developed a new base editor Target-ACE by fusing two  
10 deaminase domains for C-to-T and A-to-G base editing and demonstrated its functionality expanding the  
11 patterns of sequence alteration at a targeted genomic position. More importantly, this paper presents the  
12 possibility of tethering two base editing effectors to a single genome-editing tool, shedding light on the  
13 potential for further diversifying base editing technologies with natural and engineered Cas9 variants.  
14

### 15 **Acknowledgments**

16 We thank members of the Yachie lab for useful discussions and critical assessment of this work. This study  
17 was mainly funded by the Uehara Memorial Foundation and partly supported by the New Energy and  
18 Industrial Technology Development Organization (NEDO), Japan Agency for Medical Research and  
19 Development (AMED) PRIME program (17gm6110007), Japan Science and Technology Agency (JST)  
20 PRESTO program (10814), the Naito Foundation, SECOM Science and Technology Foundation (all to N.Y.),  
21 and Japan Society for the Promotion of Science (JSPS) Grant-in-Aid for Scientific Research (16J06287) (to  
22 S.I.). S.I. was supported by a JSPS DC1 Fellowship; S.I., H.M., and N.M. were supported by a TTCK  
23 Fellowship; H.M. and N.M. were supported by the Mori Memorial Foundation; and N.M. was supported by the  
24 Yamagishi Student Project Support Program of Keio University.  
25

### 26 **Author contributions**

27 R.S., S.I., H.M., and N.Y. conceived and designed the study. R.S., S.I., and M. Tanaka constructed the  
28 plasmids. R.S., S.I., and N.M. performed the base editor assays and the library construction for high-  
29 throughput sequencing. S.I. established the base editor reporter cell lines. M.S. performed the fluorescence  
30 microscopy imaging. S.I. and H.M. performed the data analysis. M.S. and H.A. supported the high-throughput  
31 sequencing analysis. K.N., A.K., H.N., and O.N. supported the design of Target-ACE and provided materials.  
32 M. Tomita helped the computational analyses. R.S., S.I., H.M., and N.Y. wrote the manuscript.  
33

### 34 **Competing interests**

35 K.N. and A.K. are shareholders and board members of BioPalette Co., Ltd.  
36

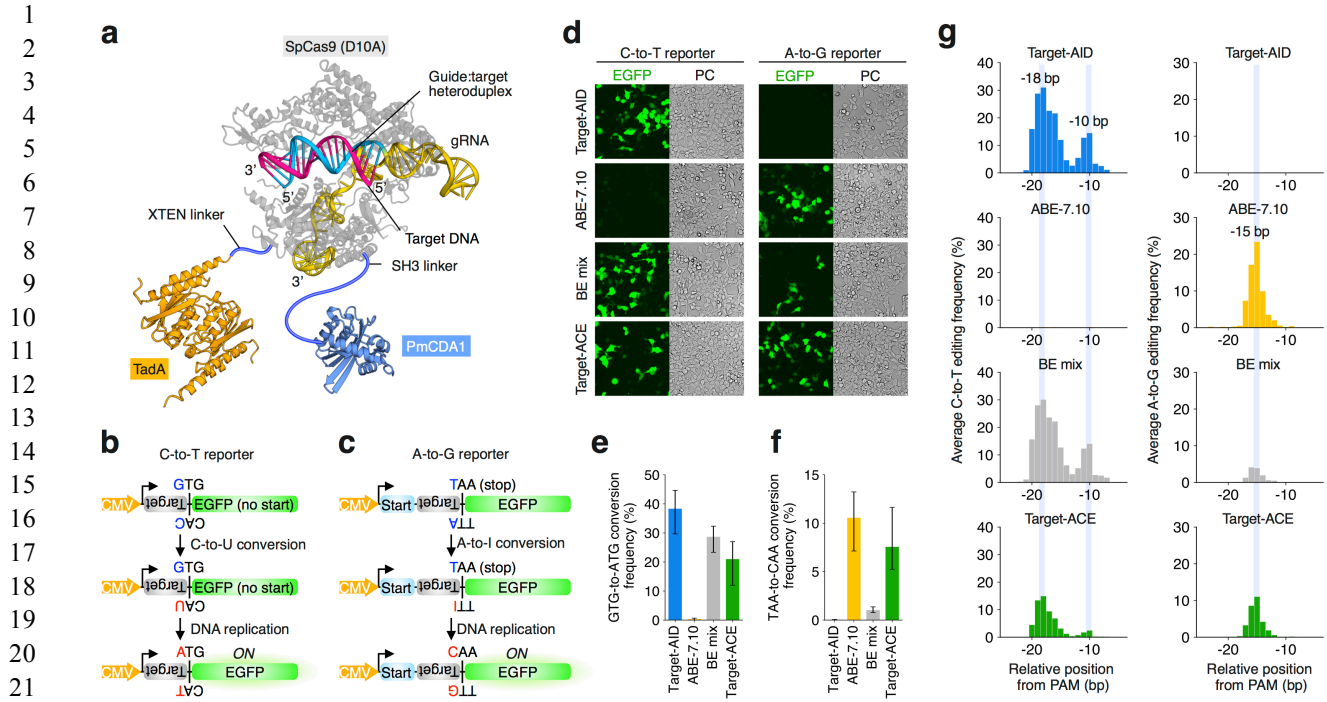

**Figure 1.** Target-ACE. **(a)** Structural overview of Target-ACE. The TadA heterodimer (orange) and PmCDA1 (light blue) are fused to the N-terminus and C-terminus ends of nCas9 (D10A) (light gray) through XTEN and SH3 linkers, respectively. NLS and UGI are not displayed in this diagram. **(b)** Schematic representation of the C-to-T base editing reporter. C-to-T base editing of the gRNA target strand followed by DNA replication restores the translation of EGFP by converting a mutated start codon GTG (valine) to ATG. **(c)** Schematic representation of A-to-G base editing reporter. A-to-G base editing of the gRNA target strand followed by DNA replication breaks a stop codon TAA to CAA (guanine) and releases the translation of its downstream EGFP. **(d)** Transfection of different base editors (or their combination) to cell lines harboring C-to-T or A-to-G base editing reporters with their corresponding gRNAs. **(e)** Average frequencies of the start codon restoration in the C-to-T editing reporter cells by different base editor reagents. Error bars show maximum and minimum frequencies of triplicates. **(f)** Average frequencies of the stop codon destruction in the A-to-G editing reporter cells by different base editor reagents. **(g)** Average C-to-T and A-to-G base editing spectra of different base editor reagents for endogenous targeting sites in HEK293Ta cells.



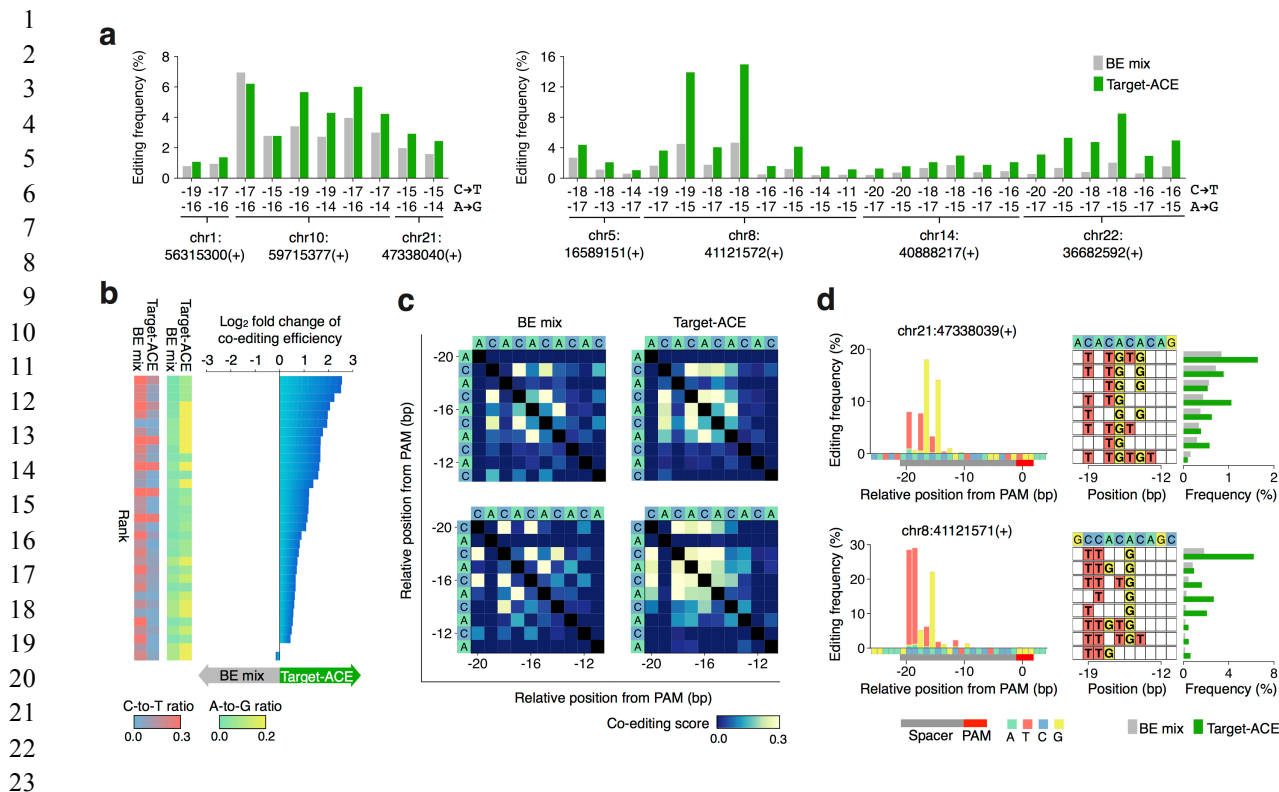

**Figure 2.** Simultaneous C-to-T and A-to-G base editing induced by Target-ACE and BE mix. **(a)** Frequencies of simultaneous base editing of cytidines and adenines at different combinatorial positions relative to PAM in poly-AC and poly-CA target regions. Each target region is denoted by its chromosome and the 5' end position and strand direction of PAM. **(b)** Comparison of simultaneous base editing frequencies by Target-ACE and BE mix for the same heterologous base combinations. For each base combination, the fold change in efficiency of Target-ACE to BE mix is represented along with the independent C-to-T and A-to-G editing frequencies induced by these methods. **(c)** Average co-editing spectra of Target-ACE and BE mix for cytidines and adenines in the region from -20 bp to -11 bp relative to PAM of poly-AC and poly-CA sequences. **(d)** Base editing spectra for Target-ACE and frequencies of multi-base editing outcomes induced by Target-ACE and BE mix for a poly-AC region and a poly-CA region arbitrarily selected. In the left panels, base editing patterns and frequencies at different positions are represented by the color-coded x-axis for source nucleotide bases and the color-coded bars for destination nucleotide bases with their frequencies. In the right panels, the multi-base editing outcomes are shown for the top eight most common outcomes preferentially induced by BE mix.

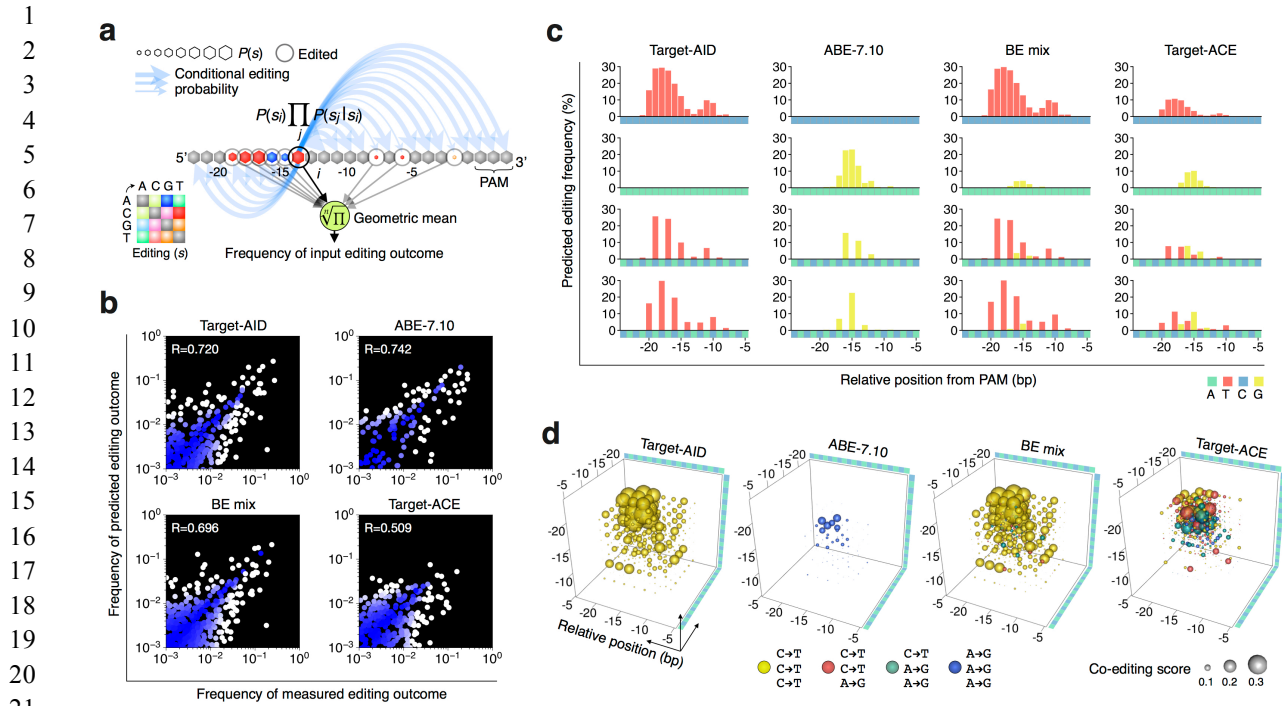

1  
2  
3  
4  
5  
6  
7  
8  
9  
10  
11  
12  
13  
14  
15  
16  
17  
18  
19  
20  
21  
22  
23 **Figure 3.** A prediction framework to simulate editing patterns induced by base editors. **(a)** Schematic  
24 diagram of the probabilistic model used in this study to predict frequencies of base editing outcomes.  
25 Briefly, to train a given base editor model, from a training amplicon sequencing data set, probabilities  
26 of single base editing events and their conditional probabilities given the other events are calculated  
27 thoroughly for different positions relative to PAM. The frequency of a given editing outcome in a test  
28 region is predicted as a geometric mean of a product of a probability of single editing status  $s_i$  with  
29 base transition and conditional probabilities of editing statuses in all the other positions given  $s_i$ . **(b)**  
30 Correlation of measured and predicted editing outcome frequencies observed by leave-one-out  
31 cross-validation for each base editing method. The blue–white color scale indicates the Euclidean  
32 distance from the perfect prediction (diagonal). **(c)** Simulated base editing spectra of different base  
33 editing methods for poly-C, poly-A, poly-AC, and poly-CA regions continuously spanning from –24 bp  
34 through –5 bp from PAM. **(d)** Simulated co-editing spectra of different base editing methods for  
35 editing three nucleotide base positions in a poly-CA sequence.

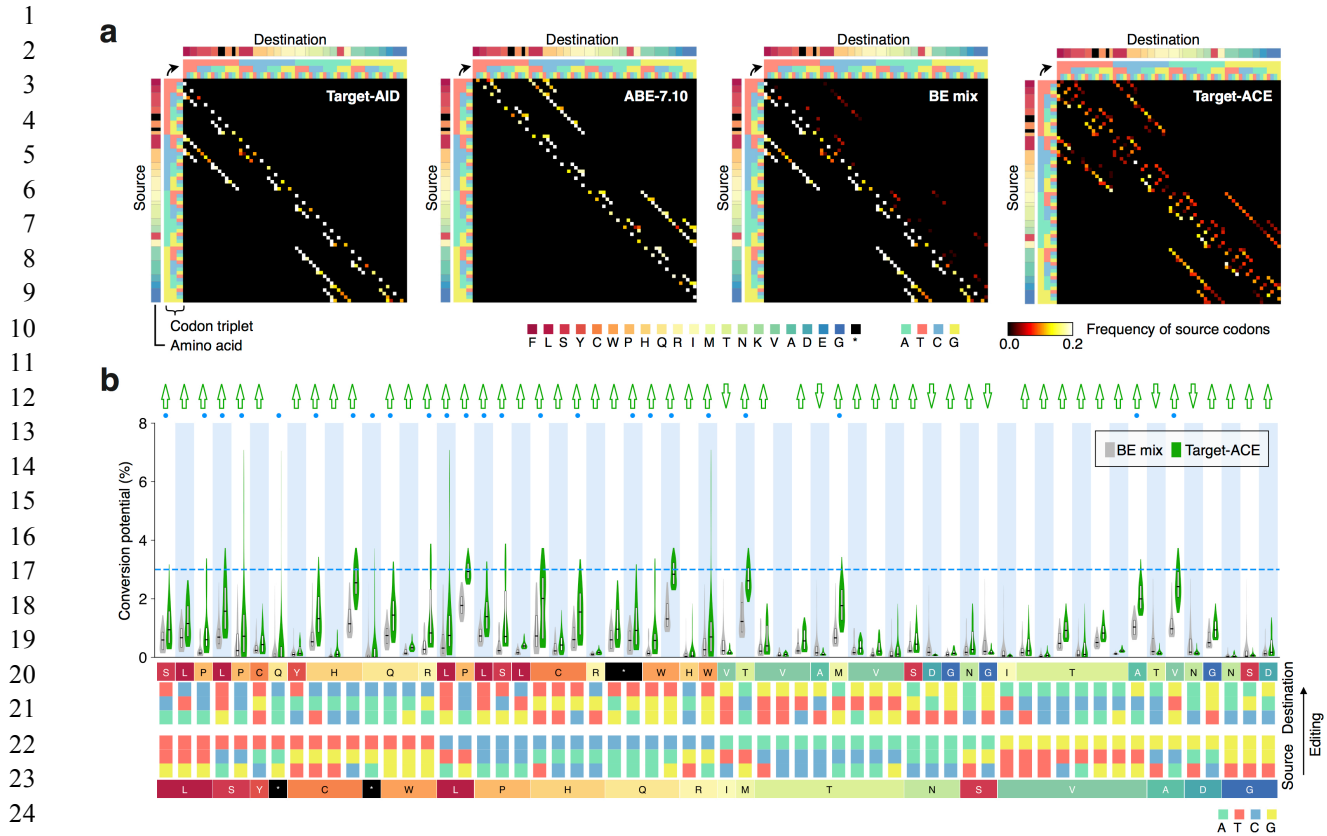

26 **Figure 4.** Simulation of genomic codon conversions by different base editing methods. **(a)** Codon  
27 convertibility profiles (CCPs) of different methods. For each source-to-destination codon conversion,  
28 the color scale indicates the fraction of the source codons in the human genome with predicted  
29 codon conversion potential of  $\geq 3\%$  that keep surrounding nucleotide regions intact. **(b)** Predicted  
30 codon conversion potential distributions of Target-ACE and BE mix for source–destination codon  
31 pair patterns each of which requires both C-to-T and A-to-G base substitutions. Green up and down  
32 arrows indicate codon pair patterns for which the conversion potential distribution for Target-ACE  
33 was significantly higher and lower than for BE mix, respectively ( $P$ -value  $< 10^{-20}$ ). Blue dots  
34 represent codon pair patterns with detected conversion potential of  $\geq 3\%$  (indicated by the blue  
35 dashed line).

36

## References

1. Cong, L. et al. Multiplex genome engineering using CRISPR/Cas systems. *Science* **339**, 819-823 (2013).
2. Mali, P. et al. RNA-guided human genome engineering via Cas9. *Science* **339**, 823-826 (2013).
3. Hsu, P.D., Lander, E.S. & Zhang, F. Development and applications of CRISPR-Cas9 for genome engineering. *Cell* **157**, 1262-1278 (2014).
4. Kuscu, C. et al. CRISPR-STOP: gene silencing through base-editing-induced nonsense mutations. *Nat Methods* **14**, 710-712 (2017).
5. Tsai, S.Q. et al. GUIDE-seq enables genome-wide profiling of off-target cleavage by CRISPR-Cas nucleases. *Nat Biotechnol* **33**, 187-197 (2015).
6. Rees, H.A. & Liu, D.R. Base editing: precision chemistry on the genome and transcriptome of living cells. *Nat Rev Genet* **19**, 770-788 (2018).
7. Nishida, K. et al. Targeted nucleotide editing using hybrid prokaryotic and vertebrate adaptive immune systems. *Science* **353**, aaf8729 (2016).
8. Komor, A.C., Kim, Y.B., Packer, M.S., Zuris, J.A. & Liu, D.R. Programmable editing of a target base in genomic DNA without double-stranded DNA cleavage. *Nature* **533**, 420-424 (2016).
9. Gaudelli, N.M. et al. Programmable base editing of A•T to G•C in genomic DNA without DNA cleavage. *Nature* **551**, 464-471 (2017).
10. Komor, A.C. et al. Improved base excision repair inhibition and bacteriophage Mu Gam protein yields C:G-to-T:A base editors with higher efficiency and product purity. *Sci Adv* **3**, eaao4774 (2017).
11. Liu, Z. et al. Efficient generation of mouse models of human diseases via ABE- and BE-mediated base editing. *Nat Commun* **9**, 2338 (2018).
12. Ryu, S.M. et al. Adenine base editing in mouse embryos and an adult mouse model of Duchenne muscular dystrophy. *Nat Biotechnol* **36**, 536-539 (2018).
13. Tan, J., Zhang, F., Karcher, D. & Bock, R. Engineering of high-precision base editors for site-specific single nucleotide replacement. *Nat Commun* **10**, 439 (2019).
14. Shibata, M. et al. Real-space and real-time dynamics of CRISPR-Cas9 visualized by high-speed atomic force microscopy. *Nat Commun* **8**, 1430 (2017).
15. Nishimasu, H. et al. Engineered CRISPR-Cas9 nuclease with expanded targeting space. *Science* **361**, 1259-1262 (2018).
16. Shen, M.W. et al. Predictable and precise template-free CRISPR editing of pathogenic variants. *Nature* **563**, 646-651 (2018).
17. Allen, F. et al. Predicting the mutations generated by repair of Cas9-induced double-strand breaks. *Nat Biotechnol*, 64-72 (2018).
18. Chen, W. et al. Massively parallel profiling and predictive modeling of the outcomes of CRISPR/Cas9-mediated double-strand break repair. *Nucleic Acids Res*, gkz487 (2019).
19. Dandage, R., Despres, P.C., Yachie, N. & Landry, C.R. beditor: A computational workflow for designing libraries of guide RNAs for CRISPR-mediated base editing. *Genetics* **212**, 377-385 (2019).
20. Abudayyeh, O.O. et al. A cytosine deaminase for programmable single-base RNA editing. *Science* **365**, 382-386 (2019).
21. Hess, G.T. et al. Directed evolution using dCas9-targeted somatic hypermutation in mammalian cells. *Nat Methods* **13**, 1036-1042 (2016).
22. Ma, Y. et al. Targeted AID-mediated mutagenesis (TAM) enables efficient genomic diversification in mammalian cells. *Nat Methods* **13**, 1029-1035 (2016).
23. Koblan, L.W. et al. Improving cytidine and adenine base editors by expression optimization and ancestral reconstruction. *Nat Biotechnol* **36**, 843-846 (2018).
24. Zafra, M.P. et al. Optimized base editors enable efficient editing in cells, organoids and mice. *Nat Biotechnol* **36**, 888-893 (2018).
25. Thuronyi, B.W. et al. Continuous evolution of base editors with expanded target compatibility and improved activity. *Nat Biotechnol* (2019).
26. Wang, X. et al. Efficient base editing in methylated regions with a human APOBEC3A-Cas9 fusion. *Nat Biotechnol* **36**, 946-949 (2018).
27. Gehrke, J.M. et al. An APOBEC3A-Cas9 base editor with minimized bystander and off-target activities. *Nat Biotechnol* **36**, 977-982 (2018).

- 1 28. Kim, Y.B. et al. Increasing the genome-targeting scope and precision of base editing with engineered  
2 Cas9-cytidine deaminase fusions. *Nat Biotechnol* **35**, 371-376 (2017).
- 3 29. Liu, Z. et al. Highly precise base editing with CC context-specificity using engineered human  
4 APOBEC3G-nCas9 fusions. *bioRxiv* (2019).
- 5 30. Zhou, C. et al. Off-target RNA mutation induced by DNA base editing and its elimination by mutagenesis.  
6 *Nature* **571**, 275-278 (2019).
- 7 31. Tycko, J. et al. Pairwise library screen systematically interrogates *Staphylococcus aureus* Cas9 specificity  
8 in human cells. *Nat Commun* **9**, 2962 (2018).
- 9 32. Zuo, E. et al. Cytosine base editor generates substantial off-target single-nucleotide variants in mouse  
10 embryos. *Science* **364**, 289-292 (2019).
- 11 33. Jin, S. et al. Cytosine, but not adenine, base editors induce genome-wide off-target mutations in rice.  
12 *Science* **364**, 292-295 (2019).
- 13 34. Grunewald, J. et al. Transcriptome-wide off-target RNA editing induced by CRISPR-guided DNA base  
14 editors. *Nature* **569**, 433-437 (2019).
- 15 35. Rees, H.A., Wilson, C., Doman, J.L. & Liu, D.R. Analysis and minimization of cellular RNA editing by  
16 DNA adenine base editors. *Sci Adv* **5**, eaax5717 (2019).
- 17 36. Grunewald, J. et al. CRISPR adenine and cytosine base editors with reduced RNA off-target activities.  
18 *bioRxiv* (2019).
- 19 37. Rees, H.A. et al. Improving the DNA specificity and applicability of base editing through protein  
20 engineering and protein delivery. *Nat Commun* **8**, 15790 (2017).
- 21 38. Lee, J.K. et al. Directed evolution of CRISPR-Cas9 to increase its specificity. *Nat Commun* **9**, 3048  
22 (2018).
- 23 39. Slaymaker, I.M. et al. Rationally engineered Cas9 nucleases with improved specificity. *Science* **351**, 84-  
24 88 (2016).
- 25 40. Kleinstiver, B.P. et al. Engineered CRISPR-Cas9 nucleases with altered PAM specificities. *Nature* **523**,  
26 481-485 (2015).
- 27 41. Chen, J.S. et al. Enhanced proofreading governs CRISPR-Cas9 targeting accuracy. *Nature* **550**, 407-410  
28 (2017).
- 29 42. Hu, J.H. et al. Evolved Cas9 variants with broad PAM compatibility and high DNA specificity. *Nature*  
30 **556**, 57-63 (2018).
- 31 43. Kleinstiver, B.P. et al. High-fidelity CRISPR-Cas9 nucleases with no detectable genome-wide off-target  
32 effects. *Nature* **529**, 490-495 (2016).

33  
34

## 1 Online Methods

2  
3 **Oligonucleotides.** The oligonucleotides used in this study can be found in Supplementary Table 2.

4  
5 **Plasmid construction. Base editor expression plasmids.** All of the expression plasmids for base editors were  
6 standardized to the backbone used in pCMV-ABE7.10 (Addgene 102919). Two split fragments of the Target-  
7 AID-encoding region were amplified from pcDNA3.1\_pCMV-nCas-PmCDA1-ugi pH1-gRNA(HPRT)  
8 (Addgene 79620) using primer sets RS045/HM129 and HM128/RS046 and assembled into the plasmid  
9 backbone amplified from pCMV-ABE7.10 using primers RS047/RS048 by Gibson Assembly, constructing  
10 pCMV-Target-AID (pRS0035). To construct pCMV-Target-ACE (pRS0045), the PmCDA1-UGI fragment  
11 was amplified from pcDNA3.1\_pCMV-nCas-PmCDA1-ugi pH1-gRNA(HPRT) using primers RS051/RS046  
12 and assembled into the plasmid backbone amplified from pCMV-ABE7.10 using primers RS047/RS052 by  
13 Gibson Assembly.

14  
15 **gRNA expression plasmids.** gRNA spacer inserts were prepared by single pot reactions of phosphorylation and  
16 annealing of ssDNA pairs listed in Supplementary Table 2. Each T4 polynucleotide kinase (PNK) reaction  
17 sample was prepared for two ssDNA fragments in accordance with the manufacturer's protocol (Takara) and  
18 set in a thermal cycler as follows: 37 °C for 30 min; 95 °C for 5 min; 70 cycles of 95 °C for 12 s and  
19 -1 °C/cycle; and then maintained at 25 °C. The annealed spacer inserts were then ligated into a pU6-gRNA  
20 cloning backbone (pSI-356) by Golden Gate Assembly using BsmBI (NEB) and T4 DNA ligase (NEB). The  
21 assembly was performed under the following thermal cycler conditions: 15 cycles of 37 °C for 5 min and  
22 20 °C for 5 min; 55 °C for 30 min; and then maintained at 4 °C.

23  
24 **Lentiviral base editing reporter plasmids.** To construct the lentiviral C-to-T base editing reporter plasmid  
25 (pLV-SI-112), the reporter cassette was amplified from pLV-eGFP (Addgene 36083) using 112-V4-BC2-  
26 FW/EGFP-BamH1-RV and cloned into EcoRI and BamHI sites of pLVSIN-CMV-Puro backbone vector  
27 (Takara) using T4 DNA ligase (NEB). The lentiviral A-to-G base editing reporter plasmid (pLV-SI-121) was  
28 constructed similarly, where the reporter cassette was amplified using EcoRI-ABE-T3-STOP-FW/EGFP-  
29 BamH1-RV instead.

30  
31 The newly constructed plasmids were confirmed by Sanger sequencing. The plasmids used in this study can be  
32 found in Supplementary Table 1, the information on which has been deposited in Addgene.

33  
34 **Selection of genomic gRNA target sites.** In the selection of gRNA target sites, the regions with poly-cytosine  
35 repeats (poly-C), poly-adenine repeats (poly-A), alternating poly-adenine/cytosine repeats (poly-AC), or  
36 alternating poly-cytosine/adenine repeats (poly-CA) were selected from the human genome (hg19) as follows.  
37 In the initial screening, poly-C regions were required to have a poly-cytosine segment in a 7-bp sliding  
38 window for which the 5' end shifted at intervals of 2 bp from -24 bp through -16 bp relative to PAM (five  
39 windows); poly-A regions were required to have a poly-adenine segment in a 6-bp sliding window for which  
40 the 5' end shifted at intervals of 2 bp from -21 bp through -13 bp relative to PAM (five windows); and poly-  
41 AC and poly-CA regions were required to have the corresponding sequence pattern in a 6-bp sliding window  
42 for which the 5' end shifted at intervals of 2 bp from -24 bp through -14 bp relative to PAM (six windows).  
43 We then eliminated the candidate regions that contained a homopolymer of  $\geq 4$  bp within a gRNA seed region  
44 spanning from -8 bp through -1 bp to PAM and those overlapping with an annotated exonic region to  
45 minimize the unexpected phenotypic effect. For every sliding window position of each of the repeat types, the  
46 top one or two candidate regions with the highest predicted gRNA activity scores<sup>44</sup> were selected, and the final  
47 target regions with various sliding window positions for each repeat type were arbitrarily selected from ones  
48 for which PCR amplifications with candidate primer sets were successful. This resulted in the eight poly-C,  
49 eight poly-A, four poly-AC, and four poly-CA target regions. (Note that one of the poly-AC target regions was

1 eliminated from the analysis due to the low sequence coverage.) All of the target regions with their  
2 corresponding gRNAs and amplicon sequencing primers can be found in Supplementary Table 2.

3  
4 **Cell culture.** HEK293Ta cells were purchased from GeneCopoeia and maintained in Dulbecco's Modified  
5 Eagle's Medium (DMEM) (Sigma) supplemented with 10% fetal bovine serum (FBS) (Thermo Fisher  
6 Scientific) and 1% penicillin–streptomycin (Sigma) at 37 °C with 5% CO<sub>2</sub>. Cells were routinely tested for  
7 mycoplasma contamination by nested PCR using culture medium as a template.

8  
9 **Establishment of base editing reporter cell lines.** For lentiviral packaging of the C-to-T and A-to-G base  
10 editing reporter plasmids,  $\sim 3.0 \times 10^5$  HEK293Ta cells/well were seeded in a six-well plate 1 day before  
11 transfection. In each packaging reaction, 489 ng of lentiviral plasmid was co-transfected with the two helper  
12 plasmids psPAX2 (Addgene 12260) and pMD2.G (Addgene 12259) of 366 ng and 122 ng, respectively, and  
13 9.38  $\mu$ L of polyethylenimine (PEI) (Polysciences) in 300  $\mu$ L of phosphate-buffered solution (PBS). The next  
14 day, culture medium was changed to fresh medium, and 2 days later, culture supernatant containing lentiviral  
15 particles was harvested and aliquoted into 1.5 mL tubes. The viral sample was then stored at  $-80$  °C before  
16 infection. For lentiviral infection,  $\sim 2.0 \times 10^6$  HEK293Ta cells/well were seeded on a six-well plate with 1 mL  
17 of cell culture medium, incubating for 24 h. The viral supernatant was then thawed at room temperature, mixed  
18 with 1  $\mu$ L of 8 mg/mL polybrene (Sigma), and added to each cell sample. One day after infection,  $\sim 5.0 \times 10^3$   
19 infected cells were re-seeded on a 96-well culture plate for functional titer measurement using CellTiter-Glo  
20 assay (Promega). Two days after infection, 2.0  $\mu$ g/mL puromycin (Thermo Fisher Scientific) was added to the  
21 culture medium and incubated for 3 days to select the base editing reporter cells.

22  
23 **Transfection assay.** For the EGFP reporter assay of base editing, the established reporter cells were seeded in  
24 a 12-well plate at a density of  $\sim 1.0 \times 10^5$  cells/well. The next day, 2.7  $\mu$ L of PEI, 100  $\mu$ L of PBS, 600 ng of  
25 base editor expression plasmid reagent, and 300 ng of gRNA expression plasmid were mixed and incubated at  
26 room temperature for 15 min before application to each well for transfection. Microscope imaging was  
27 performed 3 days after transfection with InCellAnalyzer6000 (GE Healthcare) with a 20 $\times$  objective lens. The  
28 BE mix plasmid reagent was prepared by mixing the Target-AID and ABE-7.10 plasmids at a 1:1 mass ratio.  
29 For base editing assay of the endogenous target regions, HEK293Ta cells were seeded in a 24-well plate at a  
30 density of  $\sim 5.0 \times 10^4$  cells/well. The next day, 1.2  $\mu$ L of PEI, 50  $\mu$ L of PBS, 300 ng of base editor expression  
31 plasmid, and 100 ng of gRNA expression plasmid were mixed and incubated at room temperature for 15 min  
32 before application to each well for transfection. All experiments were performed in triplicate.

33  
34 **Library preparation for high-throughput sequencing.** Three days after transfection, cell samples were  
35 transferred to a 96-well PCR plate and the culture medium was removed by aspiration. For cell lysis, 200  $\mu$ L  
36 of 50 mM NaOH was added to each sample, heated at 95 °C for 10 min, and cooled down on ice, followed by  
37 the addition of 20  $\mu$ L of 1 M Tris-HCl [pH 8.0]. Each target region was then PCR-amplified from the lysis  
38 sample as a template with the corresponding first HTS primer pair (Supplementary Table 2). Each PCR  
39 reaction was performed in a 20  $\mu$ L volume including 1  $\mu$ L of the template, 1  $\mu$ L of 10  $\mu$ M of each primer, 0.2  
40  $\mu$ L of Phusion polymerase, 5 $\times$  Phusion HF buffer, and 1.6  $\mu$ L of 2.5 mM dNTPs with the following thermal  
41 cycler conditions: 98 °C for 30 s; 30 cycles of 98 °C for 10 s, 60 °C for 10 s, and 72 °C for 10 s; followed by  
42 72 °C for 5 min as a final extension. Each amplified product was further amplified in a volume of 20  $\mu$ L  
43 containing 1  $\mu$ L of 10-fold dilution of the first PCR product and custom Illumina index primers  
44 (Supplementary Table 2) with the following thermal cycler conditions: 98 °C for 30 s; then 15 cycles of 98 °C  
45 for 10 s, 65 °C for 10 s, and 72 °C for 10 s; followed by 72 °C for 5 min as a final extension. For each base  
46 editing method, the final PCR products of different target regions were electrophoresed in 2% agarose gels  
47 with 1 $\times$  TBE buffer and the expected bands were pooled for extraction using FastGene Gel/PCR Extraction Kit  
48 (Nippon Genetics) to produce an Illumina sequencing library.

49

1 **Library quantification and sequencing.** The Illumina sequencing libraries were quantified by qPCR using  
2 KAPA Library Quantification Kit Illumina (KAPA Biosystems) and multiplexed for deep sequencing. The  
3 final multiplexed library was again quantified by qPCR and sequenced with 30% PhiX control using Illumina  
4 MiSeq (Illumina MiSeq reagent v3 600 cycles for  $2 \times 301$  bp paired-end sequencing).  
5

6 **High-throughput sequencing data analysis.** The common adapter sequences were first mapped onto the  
7 amplicon sequencing reads using NCBI BLAST+ (version 2.7.0)<sup>45</sup> with the blastn-short option, allowing  
8 identification of sample indices and demultiplexing of paired-end reads. The paired-end reads of each sample  
9 were then merged using FLASH (version 1.2.0)<sup>46</sup> to generate single sequencing reads, which were further  
10 mapped onto the corresponding reference sequence of the target region using EMBOSS needle package  
11 (version 6.6.0)<sup>47</sup> with the identity threshold of  $\geq 80\%$ . For each combination of base editor reagent and target  
12 site, the sequencing sample with the highest number of mapped reads was chosen from the triplicates for  
13 further analyses. The sequencing results for the EGFP transfection control were used to normalize sequencing  
14 errors.  
15

16 **Base editing prediction framework. Training of base editing model.** The amplicon sequencing results of  
17 different target regions were used to train a model for each base editor reagent to predict its editing outcomes  
18 and their frequencies for a given test sequence. To minimize the effects of potential sequencing errors in the  
19 training procedure, observed editing outcomes with relative frequencies of less than  $1.0 \times 10^{-4}$  are first  
20 eliminated from the dataset. Let  $s_i$  be the nucleotide base transition status at  $i$  bp position relative to PAM and  
21  $P(s_i)$  be the probability of  $s_i$ . For each target region,  $P(s_i)$  and  $P(s_j|s_i)$  are calculated for every combination  
22 of  $i$  and  $j$  in a given area ( $i \neq j$ ). The base editing model is finally constructed as average  $P(s_i)$  and average  
23  $P(s_j|s_i)$  across different training regions for which  $s_i$  is observed in  $\geq 100$  reads, represented by  $\bar{P}(s_i)$  and  
24  $\bar{P}(s_j|s_i)$ , respectively.  
25

26 *Prediction of base editing outcomes.* Let  $S_{m,n}$  be a base editing pattern in a window spanning from  $m$  bp  
27 through  $n$  bp relative to PAM, which can be alternatively represented by a string of transition statuses  
28  $s_m, s_{m+1}, \dots, s_{n-1}, s_n$ . Using the training model, the frequency of a given outcome  $S_{m,n}$  in a test target region is  
29 predicted using the following equation:

$$P(S_{m,n}) = \left( \prod_{i \in E} \left( \bar{P}(s_i) \prod_{j \in R} \bar{P}(s_j|s_i) \right) \right)^{\frac{1}{|E|}}$$

30  
31 where  $R := \{x \in Z | m \leq x \leq n\}$ ,  $E := \{x \in R | s_x \text{ represents base transition}\}$ ,  $\bar{P}(s_i) = 0$  unless defined, and  
32  $\bar{P}(s_j|s_i) = 1$  unless defined.  
33

34 *Validation of prediction framework.* The prediction framework was evaluated by leave-one-out cross-  
35 validation for each of the base editor reagents. For every given test target region, frequencies of all of the base  
36 editing outcomes detected in the amplicon sequencing dataset for a window from  $-24$  bp through  $-5$  bp  
37 relative to PAM were predicted using the datasets of the other 22 target regions. The correlations between  
38 predicted and observed frequencies of the entire outcomes in all of the target regions were then evaluated by  
39 Pearson's correlation coefficient.  
40

41 *Simulation of synthetic target sequences.* To abstract the multi-dimensional base editing spectrum of each base  
42 editing method, we generated synthetic target regions harboring poly-C, poly-A, poly-AC, and poly-CA  
43 sequences spanning from  $-24$  bp through  $-5$  bp relative to PAM and the predicted frequencies of all of their  
44 possible outcomes with C-to-T and A-to-G base substitutions ( $2^{20}$  outcomes each). For each of the synthetic  
45 target regions, a base editing spectrum and di-nucleotide and tri-nucleotide co-editing score profiles were  
46 calculated from the predicted frequencies of all of the possible outcomes.  
47



- 1 **Data availability.** The high-throughput sequencing data are available at the Sequence Read Archive  
2 (PRJNA557370) of the NCBI.  
3  
4 44. Doench, J.G. et al. Rational design of highly active sgRNAs for CRISPR-Cas9-mediated gene  
5 inactivation. *Nat Biotechnol* **32**, 1262-1267 (2014).  
6 45. Camacho, C. et al. BLAST+: architecture and applications. *BMC Bioinformatics* **10**, 421 (2009).  
7 46. Magoc, T. & Salzberg, S.L. FLASH: fast length adjustment of short reads to improve genome assemblies.  
8 *Bioinformatics* **27**, 2957-2963 (2011).  
9 47. Rice, P., Longden, I. & Bleasby, A. EMBOSS: the european molecular biology open software suite.  
10 *Trends Genet* **16**, 276-277 (2000).  
11
